# Supplementary material for: Studies on Flavor Compounds and Free Amino Acid Dynamic Characteristics of Fermented Pork Loin Ham with a Complex Starter
Source: MDPI journal article supplement (doi:10.3390/foods11101501), 2022-05-21
Supplement: s1 [file s1]

Table S1 The details of volatile compounds identified by GC-MS

|        | Number | RT    | Compound Name <sup>a</sup> | Cas #    | RS<br>I | Fermentation days <sup>b</sup> |           |           |           |           |           |           | Odor type <sup>c</sup>                       |
|--------|--------|-------|----------------------------|----------|---------|--------------------------------|-----------|-----------|-----------|-----------|-----------|-----------|----------------------------------------------|
|        |        |       |                            |          |         | 0                              | 7         | 14        | 21        | 28        | 35        | 42        |                                              |
|        |        |       |                            |          |         |                                |           |           |           |           |           |           |                                              |
| Acids  | 1      | 6.29  | Butanoic acid              | 107-92-6 | 803     | #N/A                           | #N/A      | #N/A      | #N/A      | 0.06±0.04 | 0.08±0.01 | #N/A      | Butter, Cheese, Sour                         |
|        | 2      | 3.72  | Benzoic acid, 2-fluoro-    | 445-29-4 | 971     | 0.1±0.01                       | #N/A      | #N/A      | #N/A      | #N/A      | #N/A      | #N/A      | N/A                                          |
|        | 3      | 8.31  | Isovaleric acid            | 503-74-2 | 852     | #N/A                           | 0.01±0.01 | 0.05±0    | #N/A      | #N/A      | #N/A      | #N/A      | Cheese, Pungent                              |
|        | 4      | 13.37 | Hexanoic acid              | 142-62-1 | 863     | #N/A                           | 0.1±0.01  | 0.12±0.01 | 0.14±0.04 | #N/A      | 0.15±0.01 | 0.17±0.01 | Cheese, Oil, Pungent, Sour                   |
|        | 5      | 19.67 | Octanoic acid              | 124-07-2 | 874     | #N/A                           | 0.77±0.26 | #N/A      | 0.56±0.06 | 0.56±0.13 | 0.96±0.61 | 1±0.11    | Cheese, Fat, Grass, Oil                      |
|        | 6      | 41.32 | n-Hexadecanoic acid        | 57-10-3  | 851     | #N/A                           | #N/A      | #N/A      | 0.02±0.01 | #N/A      | #N/A      | 0.02±0    | Flavoring Agents                             |
|        | 7      | 25.07 | n-Decanoic acid            | 334-48-5 | 839     | #N/A                           | 0.21±0.03 | 0.13±0.04 | 0.41±0.12 | 0.47±0.07 | 0.42±0.07 | 0.63±0.12 | Cheese, Pungent                              |
| Esters | 1      | 6.79  | Butanoic acid, ethyl ester | 105-54-4 | 839     | 0.04±0.01                      | 0.18±0.02 | 0.29±0.01 | #N/A      | 0.23±0.03 | 0.23±0.03 | 0.16±0.01 | Apple, Butter, Cheese, Pineapple, Strawberry |
|        | 2      | 21.45 | Spironolactone             | 52-01-7  | 832     | 0.07±0.01                      | 0.05±0.03 | #N/A      | #N/A      | #N/A      | #N/A      | #N/A      | N/A                                          |
|        | 3      | 23.29 | Nonanoic acid, ethyl ester | 123-29-5 | 870     | 0.07±0                         | 0.14±0.01 | 0.11±0.02 | 0.13±0.02 | 0.12±0.02 | 0.11±0.03 | 0.11±0.01 | Floral                                       |
|        | 4      | 25.97 | Decanoic acid, ethyl ester | 110-38-3 | 917     | 0.26±0.04                      | 2.38±0.26 | 2.96±0.31 | 5.11±0.49 | 6.65±1    | 7.57±0.78 | 8.39±0.59 | Brandy, Grape, Pear                          |

| Number | RT    | Compound Name <sup>a</sup>            | Cas #      | RS<br>I | Fermentation days <sup>b</sup> |           |            |            |            |           |            | Odor type <sup>c</sup>                                   |
|--------|-------|---------------------------------------|------------|---------|--------------------------------|-----------|------------|------------|------------|-----------|------------|----------------------------------------------------------|
|        |       |                                       |            |         | 0                              | 7         | 14         | 21         | 28         | 35        | 42         |                                                          |
| 5      | 8.57  | Butanoic acid, 2-methyl-, ethyl ester | 7452-79-1  | 937     | #N/A                           | 0.12±0.03 | 0.07±0     | #N/A       | 0.04±0     | 0.07±0.03 | 0.08±0.01  | Apple, Ester, Green Apple, Kiwi, Strawberry              |
| 6      | 8.76  | Butanoic acid, 3-methyl-, ethyl ester | 108-64-5   | 852     | #N/A                           | 0.99±0.1  | 0.74±0.04  | 0.44±0.05  | 0.47±0.01  | 0.5±0.03  | 1.24±0.1   | Apple, Fruit, Pineapple, Sour                            |
| 7      | 14.08 | Hexanoic acid, ethyl ester            | 123-66-0   | 915     | #N/A                           | 1.07±0.06 | 1.99±0.41  | 1.43±0.1   | 1.5±0.03   | 1.41±0.02 | 1.38±0.03  | Apple Peel, Brandy, Fruit Gum, Overripe Fruit, Pineapple |
| 8      | 20.43 | Octanoic acid, ethyl ester            | 106-32-1   | 947     | #N/A                           | 24.3±1.67 | 14.47±1.04 | 15.84±2.39 | 15.73±1.08 | 16±2.17   | 14.09±0.59 | Apricot, Brandy, Fat, Floral, Pineapple                  |
| 9      | 32.02 | Dodecanoic acid, ethyl ester          | 106-33-2   | 821     | #N/A                           | 0.02±0    | 0.05±0.01  | 0.19±0.02  | 0.28±0.05  | 0.36±0.01 | 0.45±0.04  | Floral, Fruit, Leaf                                      |
| 10     | 37.59 | Tetradecanoic acid, ethyl ester       | 124-06-1   | 807     | #N/A                           | 0.01±0    | 0.05±0.01  | 0.27±0.02  | 0.45±0.04  | 0.61±0.07 | 0.74±0.02  | Wax                                                      |
| 11     | 42.06 | Hexadecanoic acid, ethyl ester        | 628-97-7   | 852     | #N/A                           | 0.06±0.01 | 0.19±0.03  | 1.1±0.05   | 1.78±0.09  | 2.29±0.25 | 2.57±0.01  | Wax                                                      |
| 12     | 20.93 | Ethyl nicotinate                      | 614-18-6   | 855     | #N/A                           | #N/A      | 0.1±0.01   | 0.13±0.02  | 0.15±0.01  | 0.13±0.01 | 0.14±0.01  | Flavoring Agents                                         |
| 13     | 41.60 | Ethyl 9-hexadecenoate                 | 54546-22-4 | 800     | #N/A                           | #N/A      | 0.02±0     | 0.11±0     | 0.2±0.01   | 0.27±0.04 | 0.32±0.01  | Dairy                                                    |
| 14     | 45.43 | Ethyl Oleate                          | 111-62-6   | 886     | #N/A                           | #N/A      | #N/A       | 0.27±0.05  | 0.3±0.03   | 0.11±0.01 | 0.13±0     | Dairy                                                    |

| Number | RT    | Compound Name <sup>a</sup>              | Cas #     | RS<br>I | Fermentation days <sup>b</sup> |           |           |           |           |           |           | Odor type <sup>c</sup>                 |
|--------|-------|-----------------------------------------|-----------|---------|--------------------------------|-----------|-----------|-----------|-----------|-----------|-----------|----------------------------------------|
|        |       |                                         |           |         | 0                              | 7         | 14        | 21        | 28        | 35        | 42        |                                        |
| 15     | 7.20  | Propanoic acid, 2-hydroxy-, ethyl ester | 97-64-3   | 909     | #N/A                           | #N/A      | #N/A      | #N/A      | 0.9±0.18  | 0.91±0.16 | 0.41±0.15 | Cheese, Floral, Fruit, Pungent, Rubber |
| 16     | 24.73 | Benzenepropanoic acid, ethyl ester      | 2021-28-5 | 810     | #N/A                           | #N/A      | #N/A      | #N/A      | 0.04±0    | #N/A      | #N/A      | Flower, Honey                          |
| 17     | 38.35 | Isopropyl myristate                     | 110-27-0  | 859     | #N/A                           | #N/A      | #N/A      | #N/A      | 0.04±0.02 | #N/A      | #N/A      | Dairy                                  |
| 18     | 45.30 | Linoleic acid ethyl ester               | 544-35-4  | 865     | #N/A                           | #N/A      | #N/A      | #N/A      | 0.09±0.01 | 0.1±0.01  | 0.1±0     | Flavoring Agents                       |
| 19     | 19.91 | Butanedioic acid, diethyl ester         | 123-25-1  | 818     | #N/A                           | #N/A      | #N/A      | #N/A      | #N/A      | 0.01±0    | #N/A      | Cotton, Fabric, Floral, Fruit, Wine    |
| 20     | 21.75 | Benzeneacetic acid, ethyl ester         | 101-97-3  | 868     | #N/A                           | 0.04±0.02 | 0.03±0.01 | 0.04±0.01 | 0.04±0    | 0.03±0    | 0.05±0    | Floral, Fruit, Honey, Rose             |
| 1      | 20.58 | Ethanol                                 | 64-17-5   | 890     | 0.18±0.01                      | #N/A      | #N/A      | 0.35±0.01 | 0.01±0    | #N/A      | #N/A      | Flavoring Agents                       |
| 2      | 17.82 | Phenylethyl Alcohol                     | 60-12-8   | 908     | 0.14±0.01                      | 0.19±0.08 | 0.16±0.08 | 0.19±0.03 | 0.14±0.02 | 0.09±0.01 | 0.07±0.01 | Fruit, Honey, Lilac, Rose, Wine        |
| 3      | 19.97 | Terpinen-4-ol                           | 562-74-3  | 860     | #N/A                           | 0.06±0    | #N/A      | 0.05±0    | 0.04±0    | #N/A      | 0.04±0    | Earth, Must, Nutmeg, Wood              |
| 4      | 23.88 | 1-Decanol, 2-hexyl-                     | 2425-77-6 | 868     | #N/A                           | 0.03±0.03 | #N/A      | #N/A      | #N/A      | #N/A      | #N/A      | N/A                                    |

|               | Number | RT        | Compound Name <sup>a</sup>                | Cas #         | RS<br>I | Fermentation days <sup>b</sup> |               |           |           |           |               |           | Odor type <sup>c</sup>                                      |
|---------------|--------|-----------|-------------------------------------------|---------------|---------|--------------------------------|---------------|-----------|-----------|-----------|---------------|-----------|-------------------------------------------------------------|
|               |        |           |                                           |               |         | 0                              | 7             | 14        | 21        | 28        | 35            | 42        |                                                             |
| Aldehyde<br>s | 5      | 28.0<br>7 | 1-Dodecanol                               | 112-<br>53-8  | 920     | #N/A                           | 0.04±0.0<br>3 | #N/A      | 0.03±0.01 | #N/A      | 0.03±0.0<br>1 | #N/A      | Flavoring Agents                                            |
|               | 6      | 6.54      | 2,3-Butanediol                            | 513-<br>85-9  | 938     | #N/A                           | #N/A          | 0.06±0.01 | #N/A      | #N/A      | #N/A          | 0.14±0.01 | Flavoring Agents                                            |
|               | 7      | 19.3<br>2 | 1-Octanol, 2-butyl-                       | 3913-<br>02-8 | 832     | #N/A                           | #N/A          | 0.04±0.02 | #N/A      | #N/A      | #N/A          | #N/A      | N/A                                                         |
|               | 8      | 28.0<br>9 | 1-Undecanol                               | 112-<br>42-5  | 926     | #N/A                           | #N/A          | #N/A      | 0.02±0    | 0.07±0.06 | #N/A          | 0.07±0.03 | Mandarin                                                    |
|               | 9      | 22.0<br>0 | 2,6-Octadien-1-ol,<br>3,7-dimethyl-, (Z)- | 106-<br>25-2  | 830     | #N/A                           | #N/A          | #N/A      | #N/A      | 0.03±0    | #N/A          | #N/A      | Floral, Fruit                                               |
|               | 10     | 17.4<br>7 | Linalool                                  | 78-<br>70-6   | 844     | #N/A                           | #N/A          | #N/A      | #N/A      | 0.32±0.13 | #N/A          | #N/A      | N/A                                                         |
|               | 1      | 12.7<br>4 | Benzaldehyde                              | 100-<br>52-7  | 895     | 0.28±0.0<br>2                  | 0.53±0.0<br>7 | 0.48±0.07 | 0.13±0.01 | 0.18±0.02 | 0.09±0.0<br>1 | 0.11±0.02 | Bitter Almond, Burnt Sugar, Cherry,<br>Malt, Roasted Pepper |
|               | 2      | 15.6<br>0 | Benzeneacetaldehyd<br>e                   | 122-<br>78-1  | 887     | 0.05±0.0<br>1                  | #N/A          | 0.22±0.01 | 0.19±0.01 | 0.32±0.04 | 0.23±0.0<br>4 | 0.26±0.01 | Berry, Geranium, Honey, Nut,<br>Pungent                     |
|               | 3      | 17.6<br>3 | Nonanal                                   | 124-<br>19-6  | 924     | 0.89±0.0<br>1                  | 1.59±0.3<br>5 | 3.08±0.27 | 0.6±0.02  | 0.56±0.12 | 0.52±0.1      | 0.72±0.02 | Fat, Floral, Green, Lemon                                   |
|               | 4      | 20.7<br>2 | Decanal                                   | 112-<br>31-2  | 899     | #N/A                           | 0.14±0.0<br>7 | 0.14±0.06 | 0.09±0.01 | 0.09±0.05 | 0.08±0.0<br>4 | 0.15±0.01 | Floral, Fried, Orange Peel,<br>Penetrating, Tallow          |

| Number | RT        | Compound Name <sup>a</sup>                              | Cas #         | RS<br>I | Fermentation days <sup>b</sup> |               |           |           |           |               |           | Odor type <sup>c</sup>           |
|--------|-----------|---------------------------------------------------------|---------------|---------|--------------------------------|---------------|-----------|-----------|-----------|---------------|-----------|----------------------------------|
|        |           |                                                         |               |         | 0                              | 7             | 14        | 21        | 28        | 35            | 42        |                                  |
| 5      | 38.1<br>7 | Tetradecanal                                            | 124-<br>25-4  | 948     | #N/A                           | 0.15±0.0<br>1 | 0.38±0.01 | 0.02±0.01 | 1.12±0.11 | 0.76±0.0<br>3 | 0.83±0.02 | Flavoring Agents                 |
| 6      | 22.5<br>1 | Citral                                                  | 5392-<br>40-5 | 943     | #N/A                           | #N/A          | #N/A      | 0.08±0.04 | #N/A      | #N/A          | #N/A      | Lemon                            |
| 7      | 26.3<br>8 | Dodecanal                                               | 112-<br>54-9  | 868     | #N/A                           | #N/A          | #N/A      | #N/A      | 0.02±0    | #N/A          | 0.02±0    | Citrus, Fat, Lily                |
| 8      | 35.6<br>0 | Pentadecanal-                                           | 2765-<br>11-9 | 888     | #N/A                           | #N/A          | #N/A      | #N/A      | 0.02±0.01 | #N/A          | 0.01±0    | N/A                              |
| 1      | 22.1<br>3 | 2-Cyclohexen-1-<br>one, 3-methyl-6-(1-<br>methylethyl)- | 89-<br>81-6   | 803     | 0.04±0.0<br>1                  | 0.11±0.0<br>1 | 0.09±0.02 | #N/A      | #N/A      | #N/A          | #N/A      | Flavoring Agents                 |
| 2      | 22.7<br>8 | 2-Undecanone                                            | 112-<br>12-9  | 830     | #N/A                           | 0.03±0.0<br>1 | 0.06±0.01 | 0.15±0.02 | 0.16±0.03 | 0.11±0.0<br>1 | 0.09±0.02 | Fresh, Green, Orange, Rose       |
| 3      | 7.64      | 2-Hydroxychalcone                                       | 644-<br>78-0  | 963     | #N/A                           | #N/A          | 0.03±0.01 | #N/A      | #N/A      | #N/A          | #N/A      | N/A                              |
| 4      | 17.1<br>6 | 2-Nonanone                                              | 821-<br>55-6  | 916     | #N/A                           | #N/A          | 0.15±0.01 | 0.22±0.02 | 0.25±0.02 | 0.18±0.0<br>1 | 0.15±0.01 | Fragrant, Fruit, Green, Hot Milk |

a: Identification by GC/MS.

b: Volatile compounds produced (expressed as AU × 10<sup>8</sup>) in fermented tenderloin at different times. Values are presented as “MEAN ± SD”. #N/A means not detected

c: Odor descriptions were mainly gathered from online database (<https://pubchem.ncbi.nlm.nih.gov/>)
