# Supplementary material for: Studies on Flavor Compounds and Free Amino Acid Dynamic Characteristics of Fermented Pork Loin Ham with a Complex Starter
Source: MDPI journal article supplement (doi:10.3390/foods11101501), 2022-05-21
Supplement: s1 [file s1]

Figure S1. Correlation coefficient plot of VOCs and FAA in Fermented pork loin ham.

A: Correlation coefficient plot of alcohols and FAA

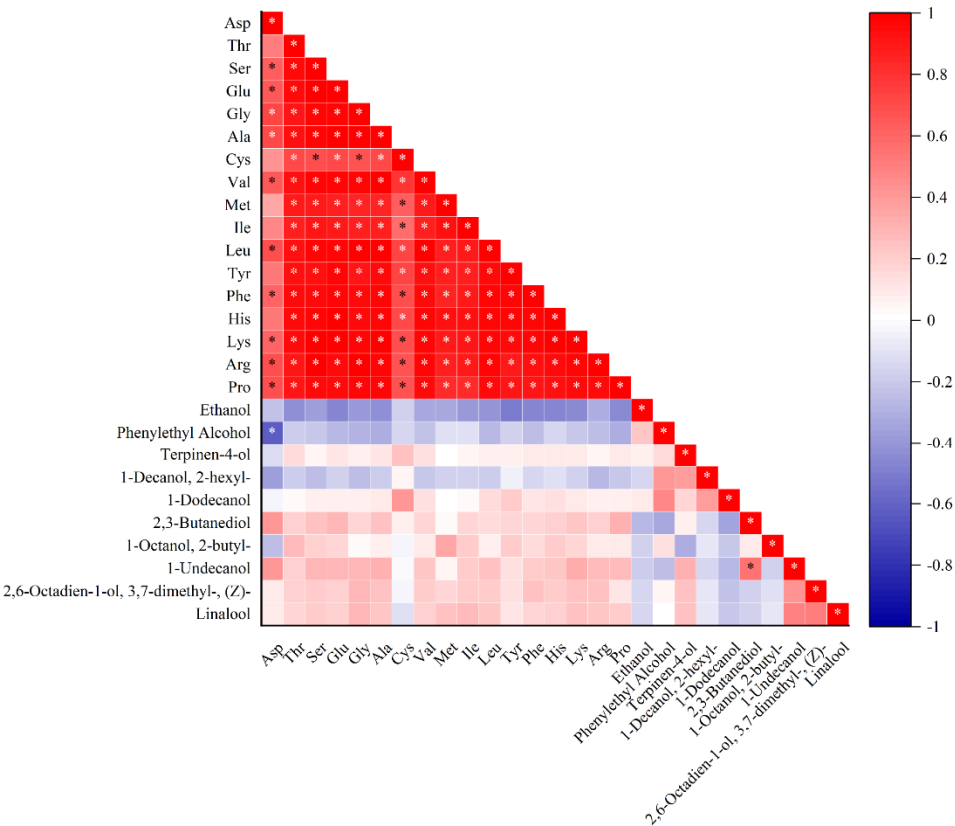

\*  $p \leq 0.01$

B: Correlation coefficient plot of aldehydes and FAA

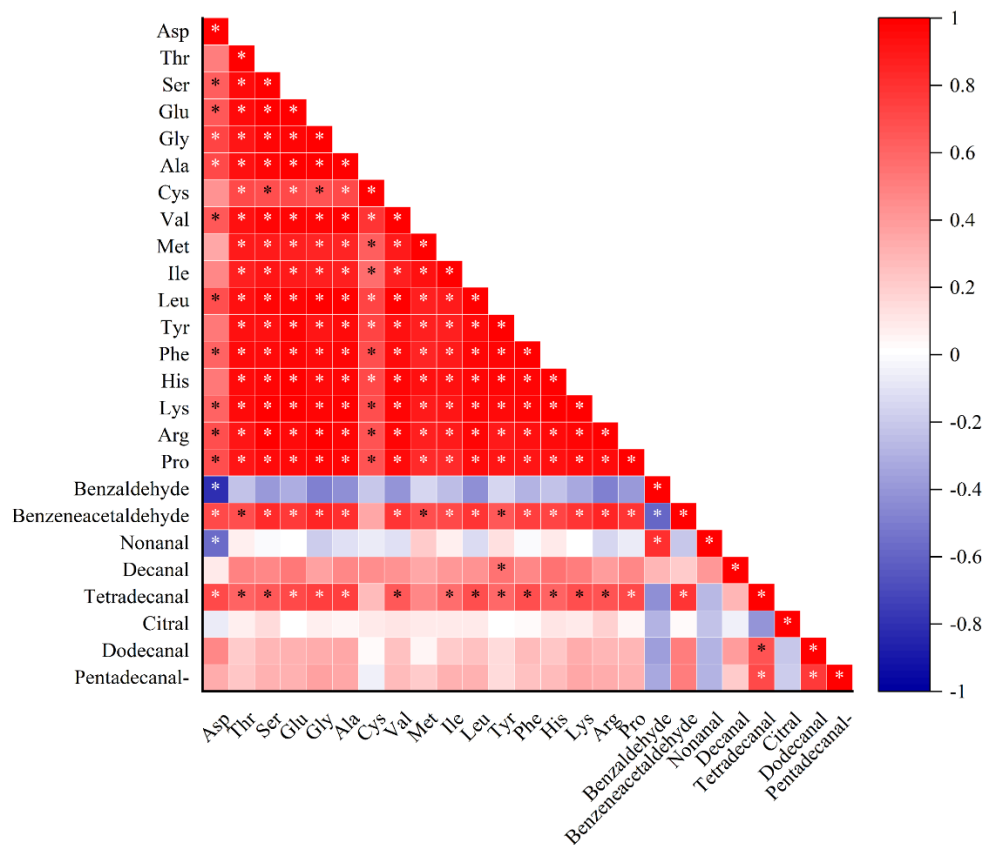

\*  $p \leq 0.01$

C: Correlation coefficient plot of acids and FAA

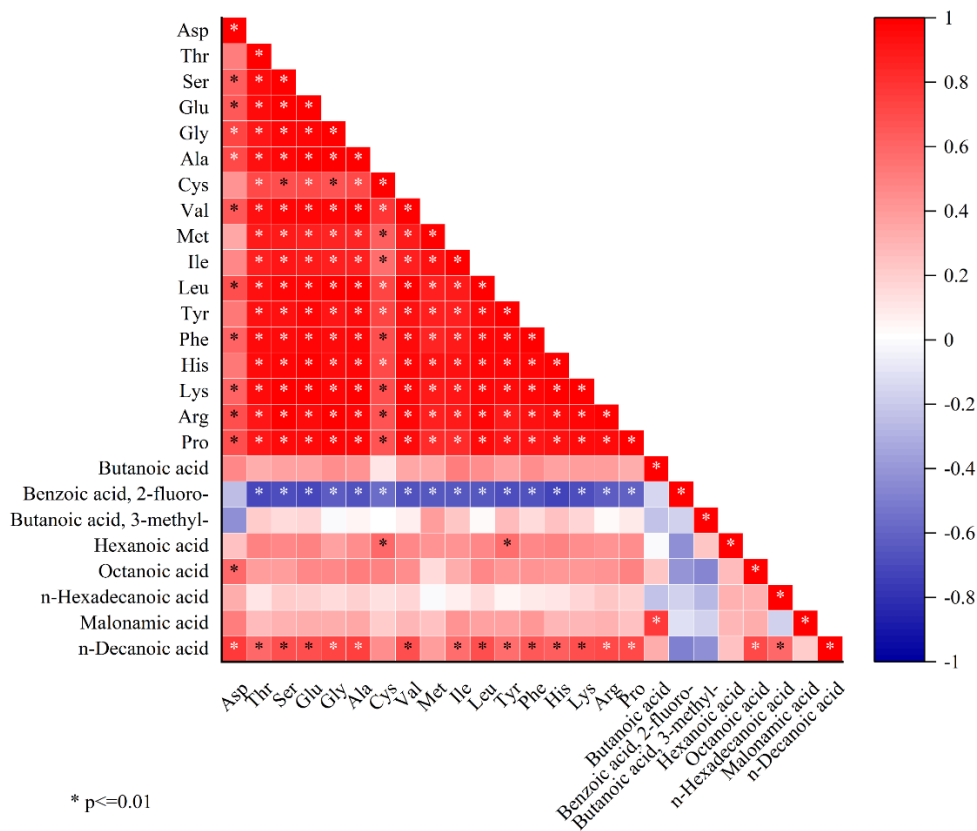

\*  $p \leq 0.01$

D: Correlation coefficient plot of ketones and FAA

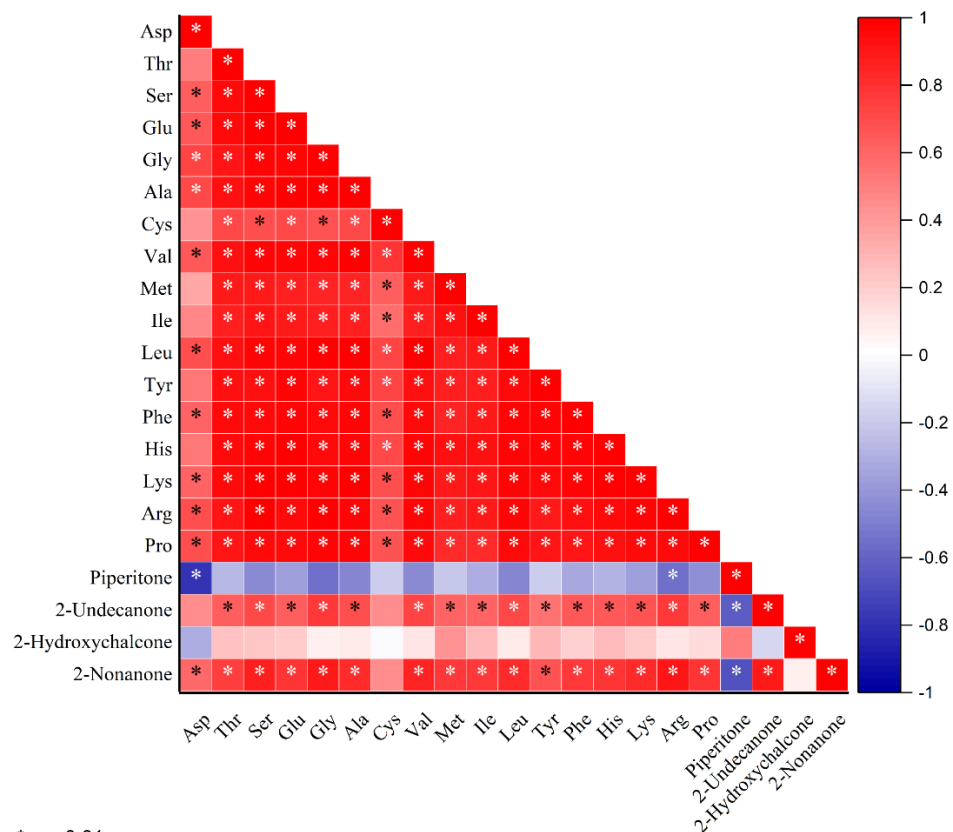

\*  $p \leq 0.01$

E: Correlation coefficient plot of Esters and FAA. \*:  $p \leq 0.01$

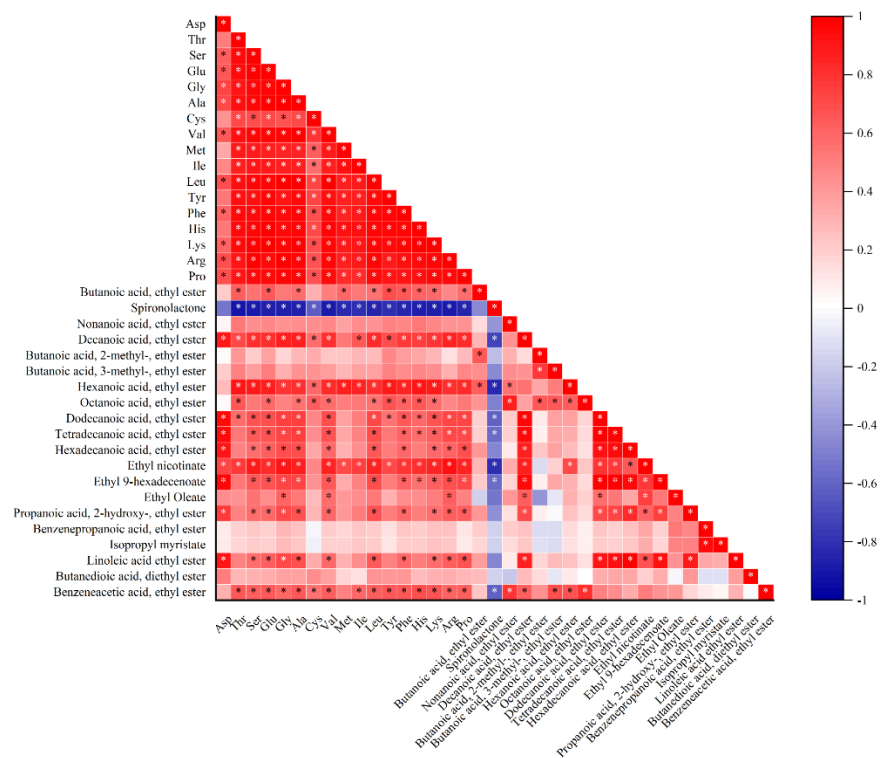

\*  $p \leq 0.01$
